# Supplementary material for: Hydrochemical Anomalies in the Vicinity of the Abandoned Molybdenum Ores Processing Tailings in a Permafrost Region (Shahtama, Transbaikal Region)
Source: MDPI journal article supplement (doi:10.3390/w15081476), 2023-04-10
Supplement: s1 [file s1]

Table S1. Saturation indices of minerals in water samples of a stream entering the surface of the tailings dump from the decay (1), pond on the surface of the tailings (5), Shahtama River (8), drinking water well (9).

| Saturation index                                   | 1      | 5       | 8      | 9      |
|----------------------------------------------------|--------|---------|--------|--------|
| Diaspore                                           | 3,389  | 3,455   | 2,694  | 2,025  |
| Gibbsite                                           | 2,522  | 2,588   | 1,827  | 1,158  |
| $\text{Al}(\text{OH})_3$                           | 1,972  | 2,038   | 1,277  | 0,608  |
| Boehmite                                           | 1,684  | 1,75    | 0,989  | 0,32   |
| $\text{Al}_2\text{O}_3(\text{s})$                  | 0,871  | 1,004   | -0,519 | -1,857 |
| $\text{Al}_4(\text{OH})_{10}\text{SO}_4(\text{s})$ | 0,599  | 4,305   | -2,419 | -6,618 |
| Alunite                                            | -1     | 5,399   | -2,639 | -7,163 |
| $\text{PbMoO}_4(\text{s})$                         | -0,633 | -0,246  | 0,387  | -1,024 |
| Hydroxyapatite                                     | -7,294 | -12,714 | -1,362 | 0,341  |
| Dolomite                                           | -4,236 | -6,71   | -0,92  | 0,292  |
| Calcite                                            | -2,057 | -3,208  | -0,356 | 0,273  |
| Aragonite                                          | -2,201 | -3,351  | -0,499 | 0,129  |

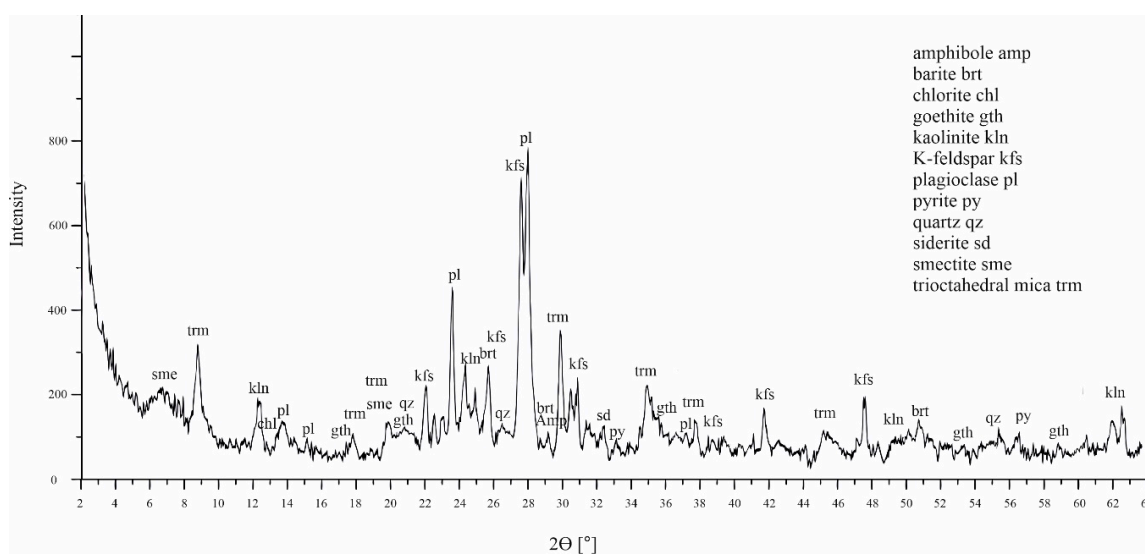

Figure S1. The XRD patterns for the phase composition of crystalline substances and their quantitative phase ratios

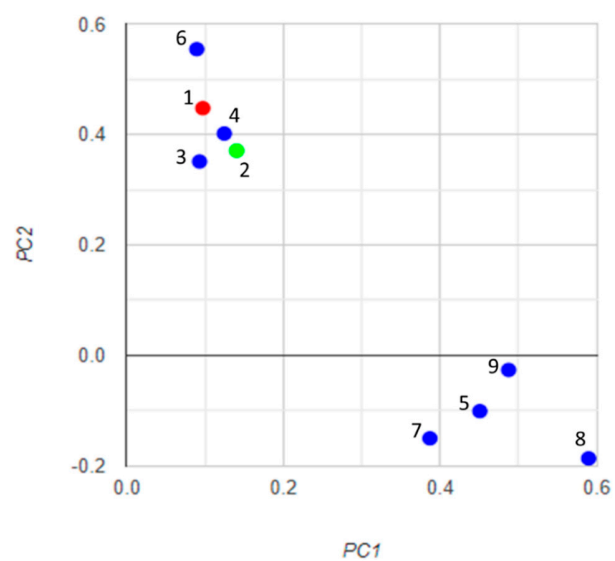

Figure. S2. Principal component plot as a result of the principal component analysis for the microelement composition of the surface waters in the surrounding area of the Shahtama tailings (samples 1-9, Table 3)
